# Supplementary material for: Ru nanoparticles supported on alginate-derived graphene as hybrid electrodes for the hydrogen evolution reaction
Source: Royal Society of Chemistry journal article supplement (doi:10.1039/d1nj05215b), 2021-11-17
Supplement: d1nj05215b1.pdf [file d1nj05215b1.pdf]

## Supporting Information

### **Ru nanoparticles supported on alginate-derived graphene for the hydrogen evolution reaction**

Laura Mallón,<sup>a, c</sup> Christian Cerezo-Navarrete,<sup>b</sup> Nuria Romero,<sup>a</sup> Marta Puche,<sup>b</sup> Jordi García-Antón,<sup>a</sup> Roger Bofill,<sup>\*a</sup> Karine Philippot,<sup>\*c</sup> Luis M. Martínez-Prieto<sup>\*b</sup> and Xavier Sala<sup>\*a</sup>

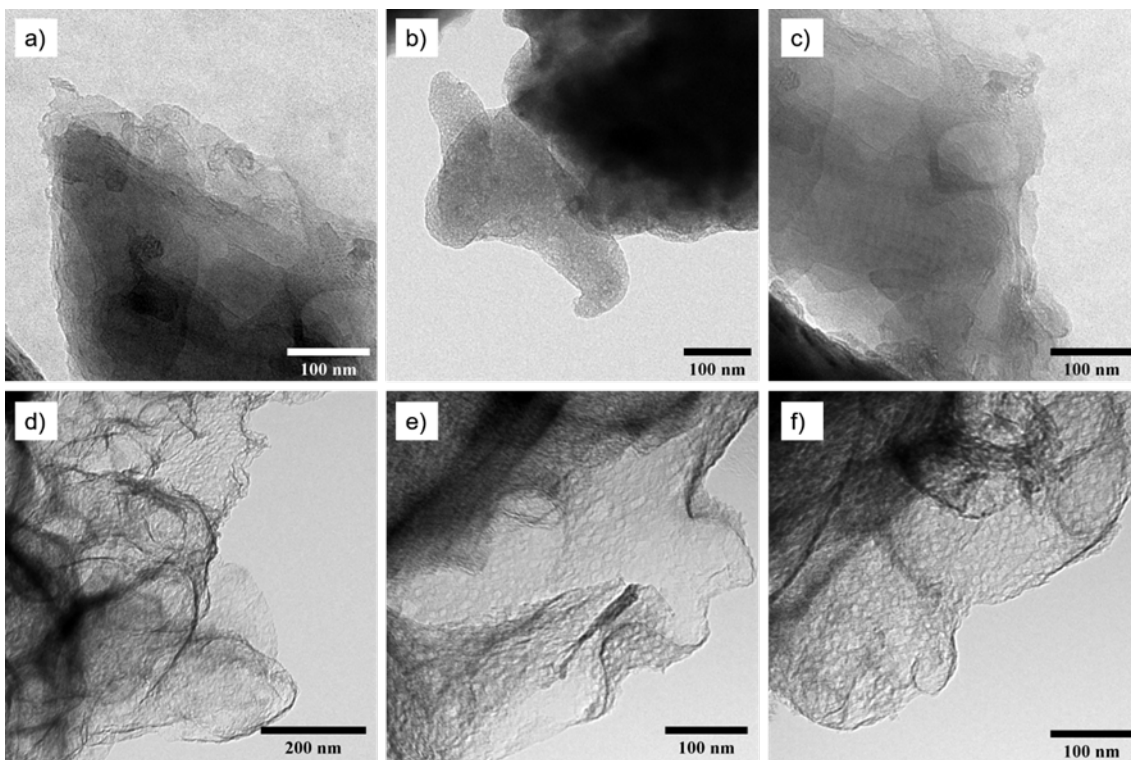

**Figure S1.** TEM images of **G** (a-c) and **P-G** (d-f) supports.

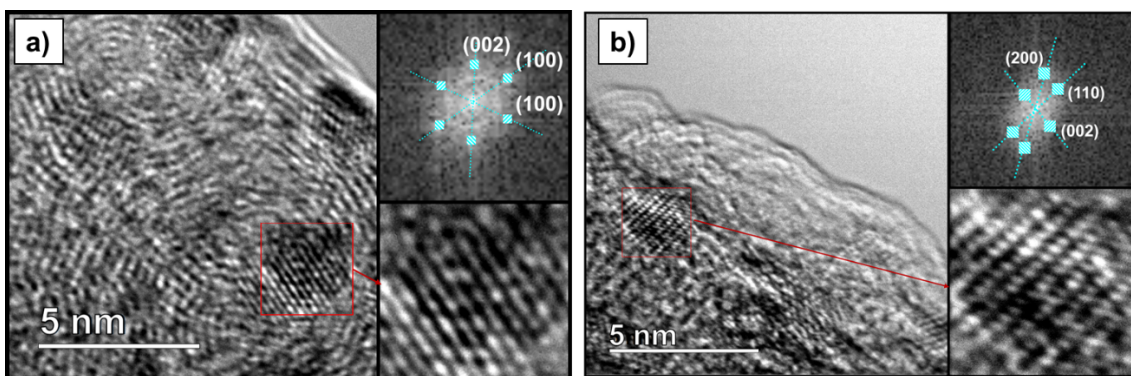

**Figure S2.** HRTEM images, chosen expanded zone and corresponding Fourier Transform Analysis with planar reflections for **Ru/P-G** (a) and **Ru/G** (b).

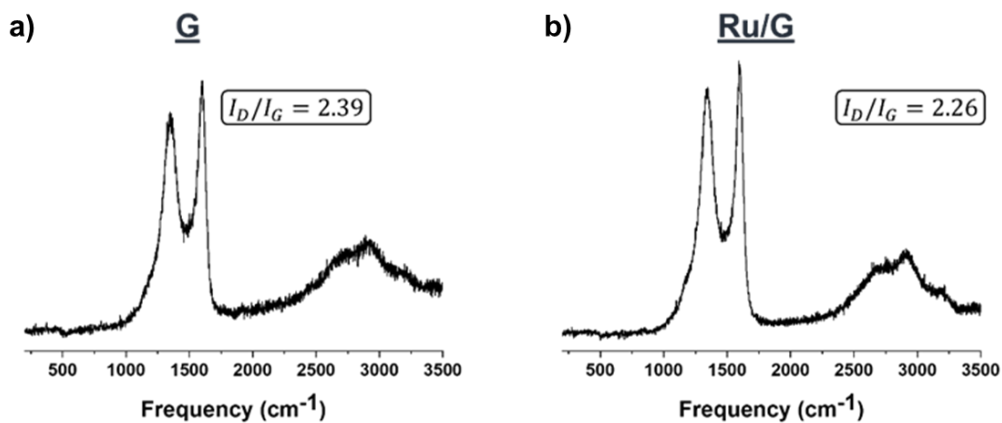

**Figure S3.** Raman spectrum and  $I_D/I_G$  ratio of **G** (a) and **Ru/G** (b).

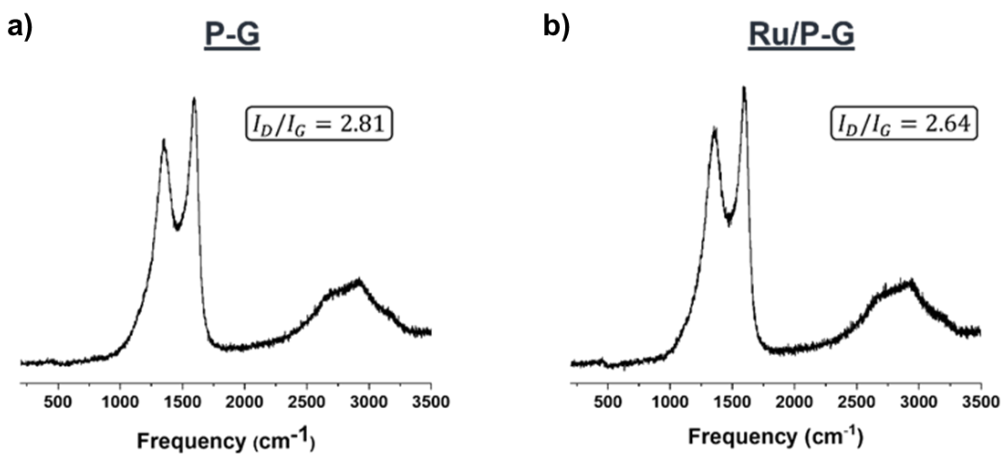

**Figure S4.** Raman spectrum and  $I_D/I_G$  ratio of **P-G** (a) and **Ru/P-G** (b).

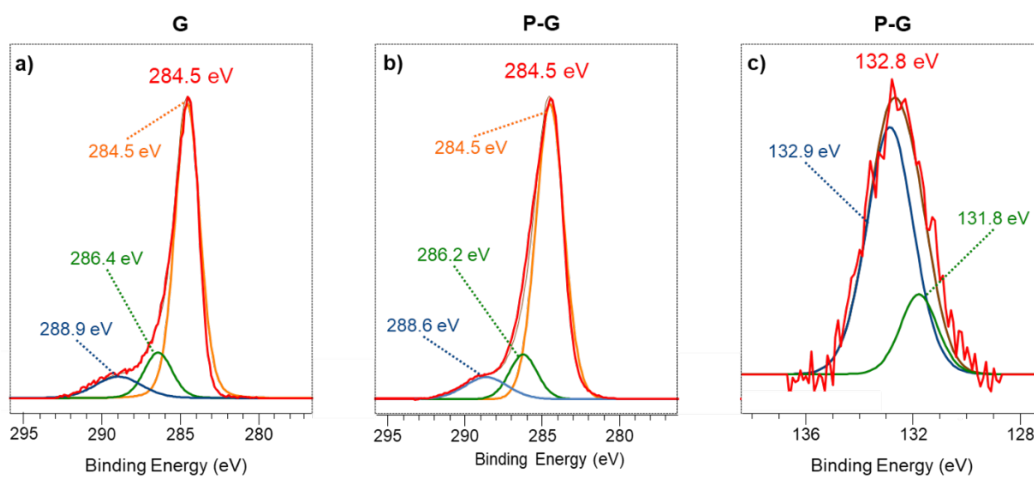

**Figure S5.** XPS signal of the C 1s bands of **G** (a) and **P-G** (b), and the P 2p band of **P-G** (c). Deconvoluted peak component analysis is shown for each case (baseline as red curve).

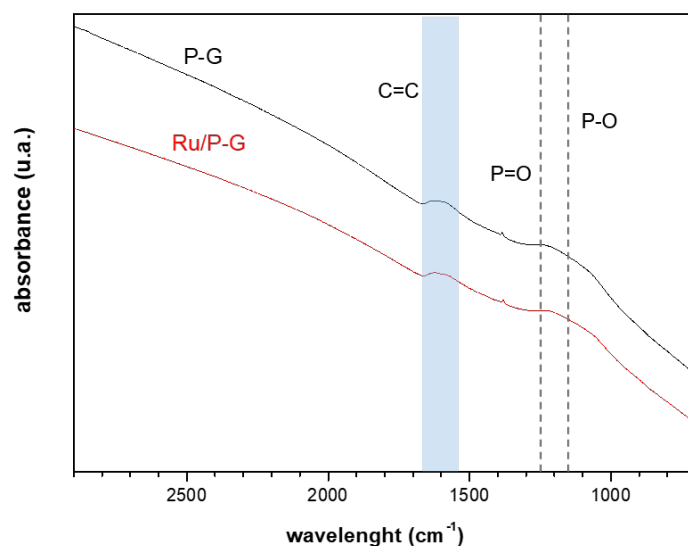

**Figure S6** FT-IR spectra of **P-G** (top; black) and **Ru/P-G** (bottom; red).

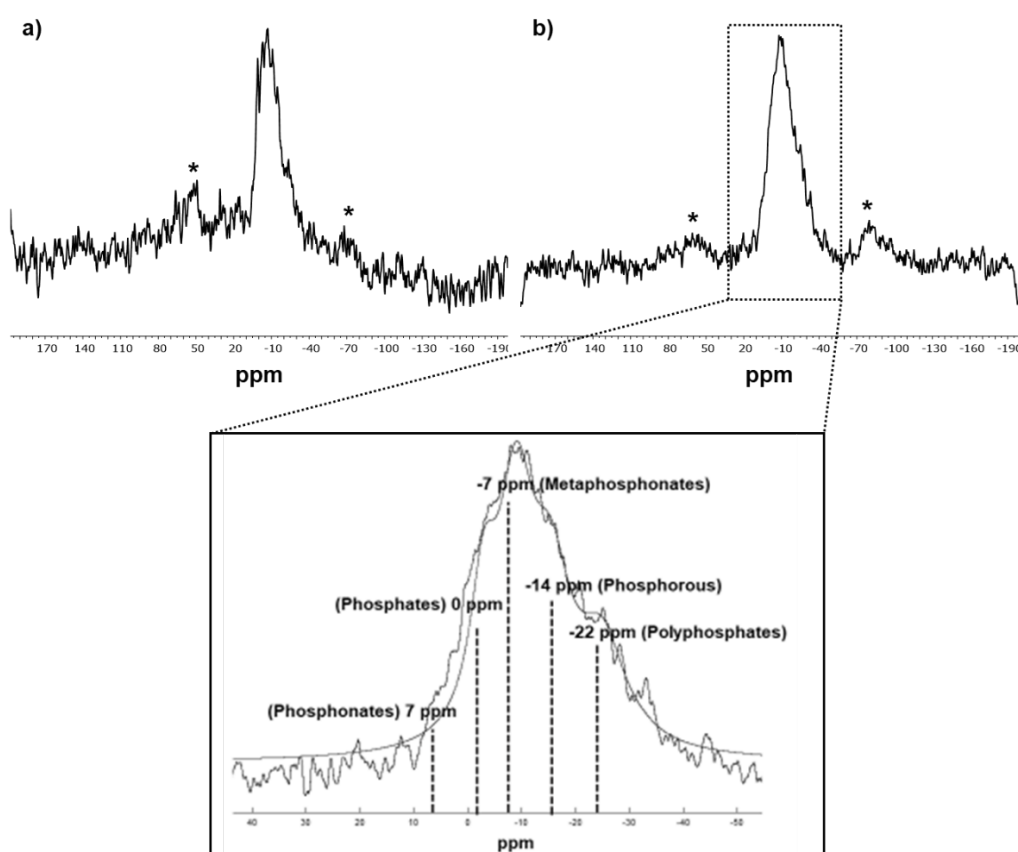

**Figure S7.**  $^{31}\text{P}$  MAS NMR spectra of a) **P-G** and b) **Ru/P-G**. Asterisks (\*) mark the spinning side bands. The positions of phosphonate (7 ppm), phosphates (0 ppm), metaphosphonates (-7 ppm), phosphorous (-14 ppm) and polyphosphate (-22 ppm) are indicated on the zoomed part.

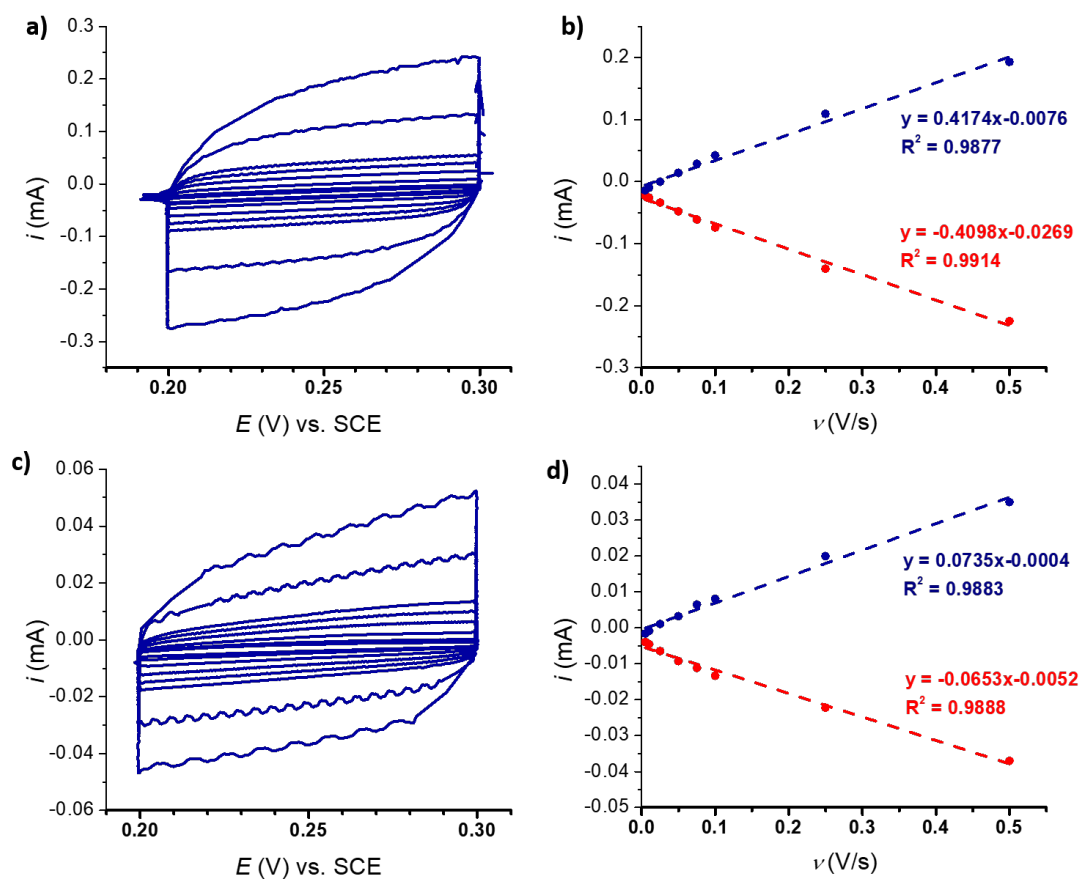

**Figure S8.** Representative multi CV experiment at different scan rates for  $C_{DL}$  determination of **Ru/G** (a) and **Ru/P-G** (c). Plot of current values at 0.25 V (vs. SCE) for the different scan rates in 1 M H<sub>2</sub>SO<sub>4</sub> for **Ru/G** (b) and **Ru/P-G** (d).

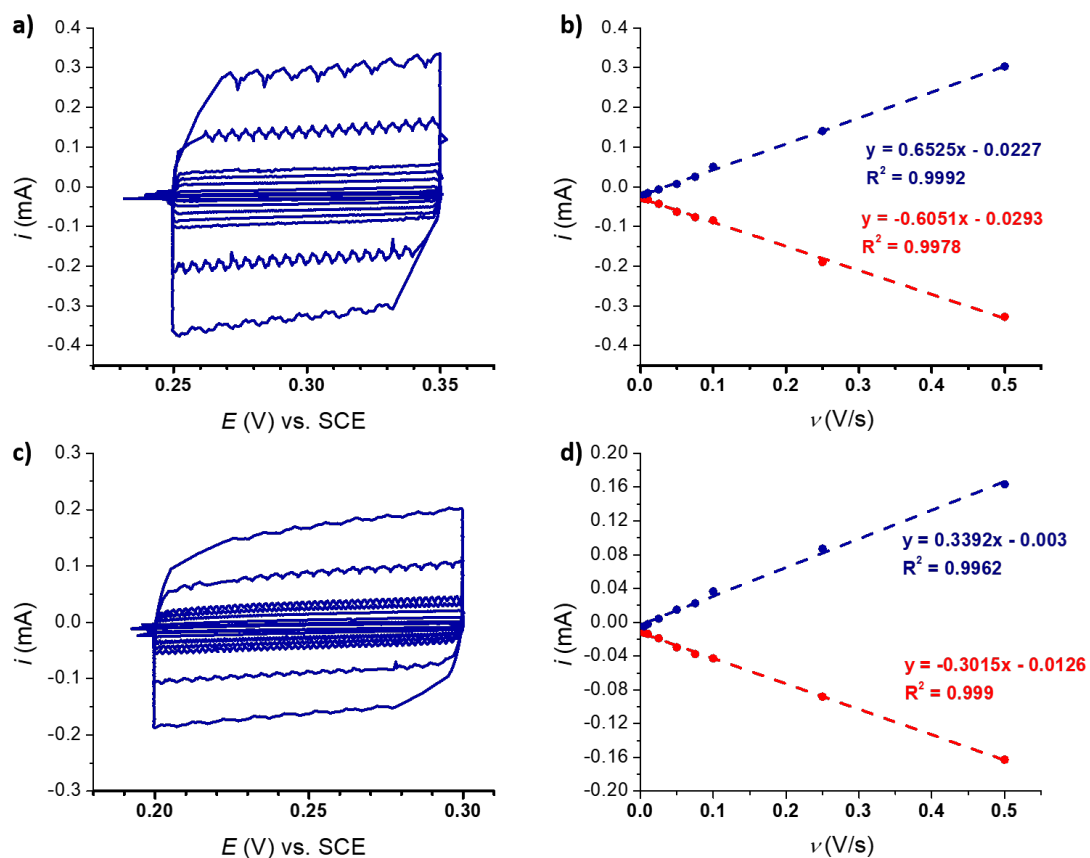

**Figure S9.** Representative multi CV experiment at different scan rates for  $C_{DL}$  determination of **Ru/G-r** (a) and **Ru/P-G-r** (c). Plot of current values at 0.30 V and 0.25 V (vs. SCE) for the different scan rates in 1 M  $H_2SO_4$  for **Ru/G-r** (b) and **Ru/P-G-r** (d), respectively.

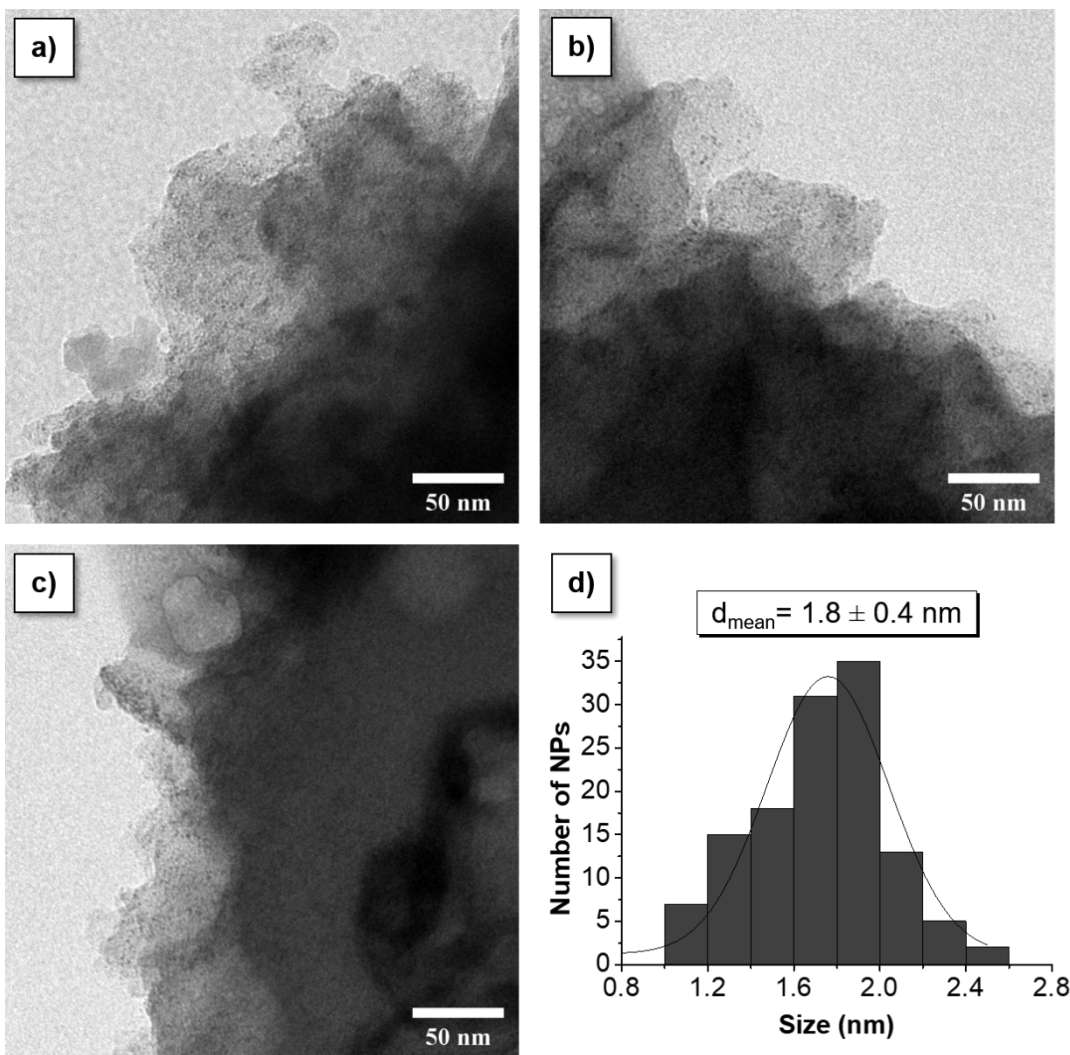

**Figure S10.** TEM images and corresponding histogram of **Ru/G** after 2 h under catalytic conditions ( $j = -10 \text{ mA/cm}^2$ ).

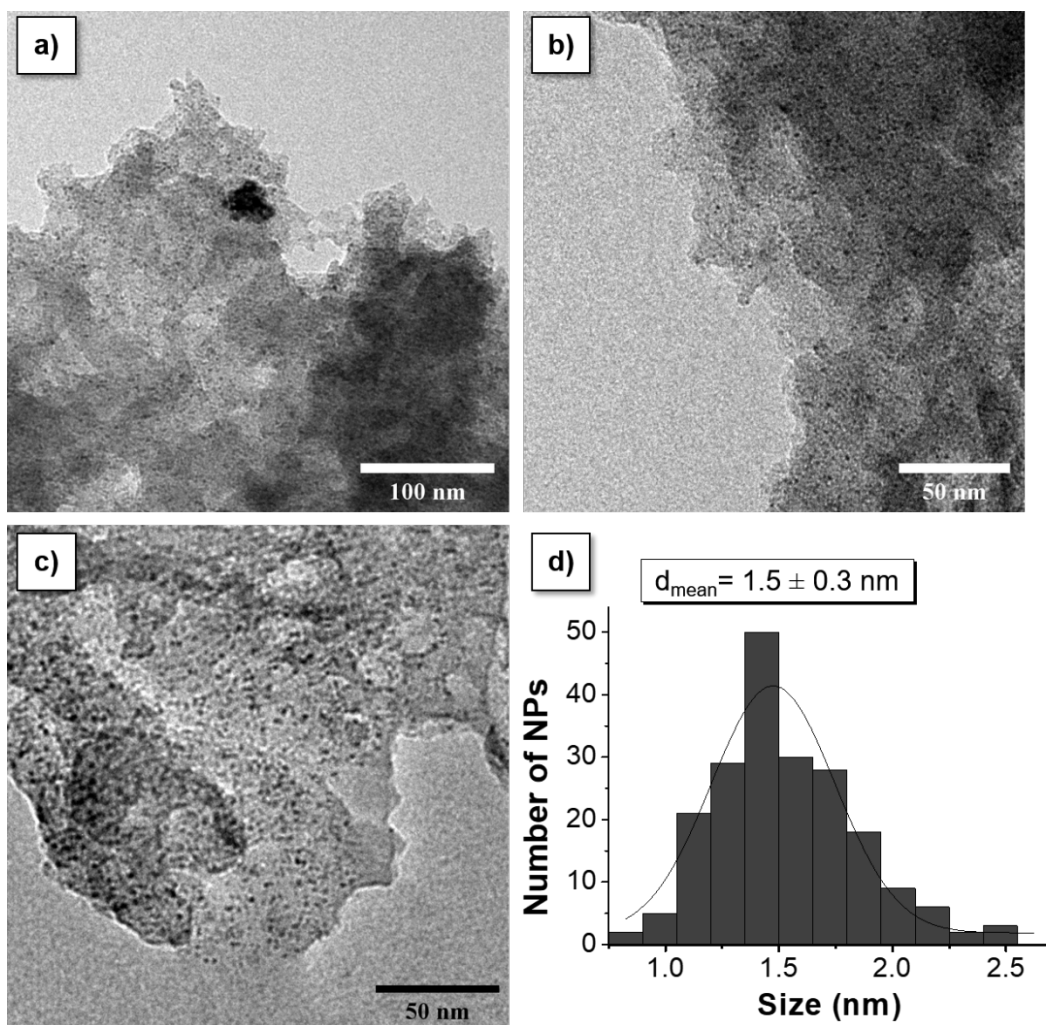

**Figure S11.** TEM images and corresponding histogram of **Ru/P-G** after 2 h under catalytic conditions ( $j = -10 \text{ mA/cm}^2$ ).

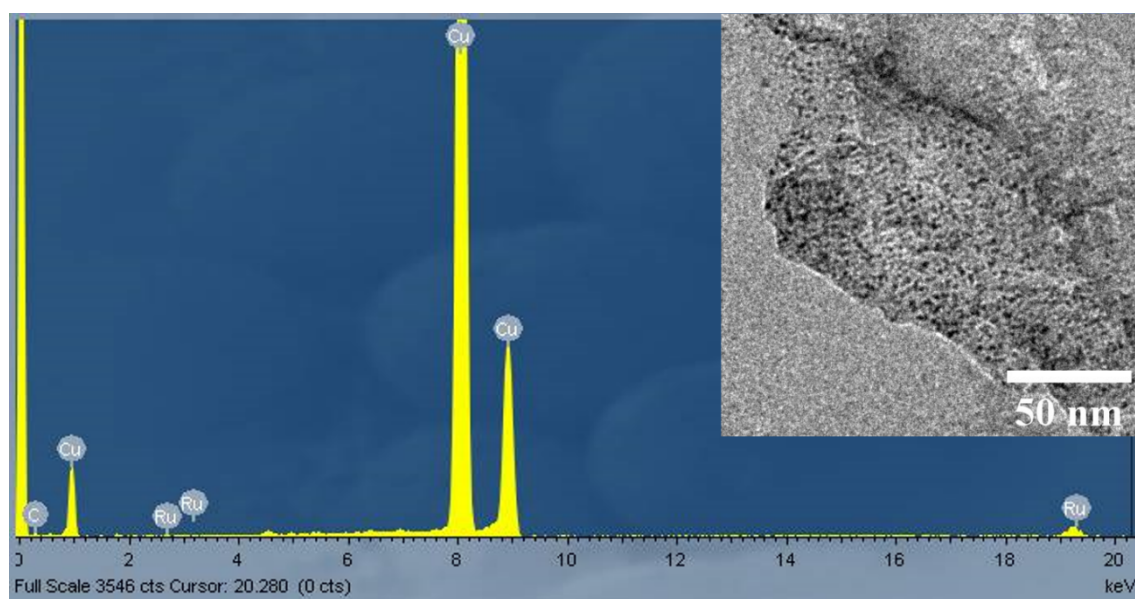

**Figure S12.** TEM/EDX analysis of **Ru/P-G** after 2 h under catalytic conditions ( $j = -10 \text{ mA/cm}^2$ ).



**Table S1.** Comparison of the most relevant graphene-derived and Ru/graphene-based HER nanoelectrocatalysts under acidic conditions. Parameters: mean diameter ( $\emptyset$ ), onset overpotential ( $\eta_0$ , mV), overpotential at  $|j| = 10 \text{ mA} \cdot \text{cm}^{-2}$  ( $\eta_{10}$ , mV), Tafel slope ( $b$ ,  $\text{mV} \cdot \text{dec}^{-1}$ ), exchange current density ( $|j_0|$ ,  $\text{mA} \cdot \text{cm}^{-2}$ ), specific current density ( $|j_s|$ ,  $\text{mA} \cdot \text{cm}^{-2}$ ) and turnover frequency (TOF,  $\text{s}^{-1}$ ). Unless otherwise stated, electrolyte is 0.5 M  $\text{H}_2\text{SO}_4$ .

| Entry | Catalyst                  | $\emptyset$<br>(nm) | $\eta_0$<br>(mV) | $\eta_{10}$<br>(mV) | $b$<br>( $\text{mV} \cdot \text{dec}^{-1}$ ) | $ j_0 $<br>( $\text{mA} \cdot \text{cm}^{-2}$ ) | Ref.      |
|-------|---------------------------|---------------------|------------------|---------------------|----------------------------------------------|-------------------------------------------------|-----------|
| 1     | GCE-S-GNs-1000-CB-Ru      | 30                  | $\approx 60$     | 80                  | 61 (Tafel)<br>71 (EIS)                       | 0.541<br>0.431                                  | 1         |
| 2     | Ru-GLC                    | 2-5                 | 3                | 35                  | 46                                           | -                                               | 2         |
| 3     | $\text{Ru}_2\text{P/RGO}$ | <7                  | $\approx 0$      | 22                  | 29                                           | 2.2                                             | 3         |
| 4     | Ru@GnP                    | 2                   | $\approx 0$      | 13                  | 30                                           | -                                               | 4         |
| 5     | N-G                       | -                   | $\approx 250$    | 490                 | 116                                          | -                                               | 5         |
| 6     | P-G                       | -                   | $\approx 300$    | 550                 | 133                                          | -                                               | 5         |
| 7     | N,P-G                     | -                   | $\approx 240$    | 420                 | 91                                           | 0.00024                                         | 5         |
| 8     | N,B-CN                    | -                   | $\approx 410$    | 710                 | 198                                          | -                                               | 6         |
| 9     | N-CN                      | -                   | $\approx 400$    | 620                 | 159                                          | -                                               | 6         |
| 10    | N,P-CN                    | -                   | $\approx 340$    | 550                 | 139                                          | -                                               | 6         |
| 11    | N,S-CN                    | -                   | $\approx 100$    | 290                 | 77                                           | -                                               | 6         |
| 12    | N-G                       | -                   | 499              | -                   | 405                                          | 86                                              | 7         |
| 13    | N,P-G                     | -                   | 399              | -                   | 565                                          | 265                                             | 7         |
| 14    | P-G                       | -                   | 536              | -                   | 348                                          | 76                                              | 7         |
| 15    | P,N-G                     | -                   | 247              | 380                 | 126                                          | 21                                              | 7         |
| 16    | VG                        | -                   | $\approx 375$    | -                   | 158                                          | -                                               | 8         |
| 17    | N-VG                      | -                   | $\approx 200$    | 290                 | 121                                          | -                                               | 8         |
| 18    | Ru/NG-750                 | 3-7                 | $\approx 0$      | 53                  | 44                                           | -                                               | 9         |
| 19    | Ru@CN                     | 2.37                | $\approx 70$     | 126                 | -                                            | -                                               | 10        |
| 20    | Ru-NGA                    | 3.5                 | $\approx 15$     | 55                  | 32                                           | -                                               | 11        |
| 21    | Ru@NC                     | 2.1                 | $\approx 10$     | 62                  | 40                                           | -                                               | 12        |
| 22    | Ru/G-r                    | 1.9                 | $\approx 0$      | 29                  | 48                                           | 2.50                                            | This work |
| 23    | Ru/P-G-r                  | 1.5                 | $\approx 0$      | 15                  | 49                                           | 4.97                                            | This work |

Legend: GCE-S-GNs-1000=glassy carbon modified sulfur-doped graphene nanosheets heat treated at 1000 °C, GLC=graphene-layered carbon, RGO=reduced graphene oxide, GnP=graphene nanoplatelets. N-G=N-doped graphene; P-G=P-doped graphene; N,P-G=N,P-doped graphene; N,B-CN=N,B-doped carbon nanosheets, N-CN=N-doped carbon nanosheets, N,P-CN=N,P-doped carbon nanosheets, N,s-CN=N,S-doped carbon nanosheets, P,N-G=P,N-doped graphene, VG=vertical graphene, N-VG=N-doped vertical graphene, Ru/NG-750= Ru nanoclusters on N-doped graphene prepared at 750 °C, Ru@CN=Ru NPs over N-doped carbon, Ru-NGA= Ru-modified N-doped graphene aerogel, Ru@NC= Ru NPs embedded in N-doped carbon.

## References

- 
- <sup>1</sup> R. K. Shervedani and A. Amini, *Carbon* **2015**, 93, 762-773.
  - <sup>2</sup> Z. Chen, J. Lu, Y. Ai, Y. Ji, T. Adschiri and L. Wan, *ACS Appl. Mater. Interfaces* **2016**, 8, 35132-35137.
  - <sup>3</sup> T. Liu, S. Wang, Q. Zhang, L. Chen, W. Hu and C.M. Li, *Chem. Commun.* **2018**, 54, 3343-3346.
  - <sup>4</sup> F. Li, G.F. Han, H.J. Noh, I. Ahmad, I.Y. Jeon and J.B. Baek, *Adv. Mater.* **2018**, 30, 1803676.
  - <sup>5</sup> Y. Zheng, Y. Jiao, L.H. Li, T. Xing, Y. Chen, M. Jaroniec and S.Z. Qiao, *ACS Nano* **2014**, 8, 5, 5290-5296.
  - <sup>6</sup> K. Qu, Y. Zheng, X. Zhang, K. Davey, S. Dai and S.Z. Qiao, *ACS Nano* **2017**, 11, 7293-7300.
  - <sup>7</sup> Y.H. Hung, D. Dutta, Y.J. Tseng, J.K. Chang, A.J. Bhattacharyya and C.Y. Su, *J. Phys. Chem. C* **2019**, 123, 22202-22211.
  - <sup>8</sup> Y. Li, C. Ai, S. Deng, Y. Wang, X. Tong, X. Wang, X. Xia and J. Tu, *Materials Research Bulletin* **2021**, 134, 111094.
  - <sup>9</sup> R. Ye, Y. Liu, Z. Peng, T. Wang, A.S. Jalilov, B.I. Yakobson, S.H. Wei and J.M. Tour, *ACS Appl. Mater. Interfaces* **2017**, 9, 3785-3791.
  - <sup>10</sup> J. Wang, Z. Wei, S. Mao, H. Li and Y. Wang, *Energy Environ. Sci.* **2018**, 11, 800-806.
  - <sup>11</sup> Y. Shi, W. Dai, M. Wang, Y. Xing, X. Xia and W. Chen, *Chem. Res. Chinese Universities*, **2020**, 36 (4), 709-714.
  - <sup>12</sup> B. Zheng, L. Ma, B. Li, D. Chen, X. Li, J. He, J. Xie, M. Robert and T.C. Lau, *Catal. Sci. Technol.* **2020**, 10, 4405-4411.
